# Supplementary material for: Atmospheric deposition of nutrients and excess N formation in the North Atlantic
Source: Copernicus journal article supplement (doi:10.5194/bg-7-777-2010), 2010-02-26
Supplement: Supplementary file 1 [file bg-7-777-2010-supplement.pdf]

## Appendix

### 1 Ecosystem model

The implementation of the ecosystem model is a modification of previous work [1, 2]. The main difference is the introduction of an additional detritus compartment which allows to simulate differing decay time scales of phosphorous and nitrogen. The seven prognostic variables are: nitrate, phosphate, (non-nitrogen-fixing) phytoplankton, zooplankton, two detritus compartments describing nitrogen and phosphorus content and dissolved oxygen. Each prognostic variable  $C$  is determined following:

$$\frac{\partial C}{\partial t} = T + sms, \quad (1)$$

where  $T$  represents all diffusive and advective transport terms.  $sms$  denote the source minus sink terms, which describe the biogeochemical interactions as follows:

Phytoplankton (P) equation:

$$sms(P) = \bar{J}P - G(P)Z - \mu_P P \quad (2)$$

Zooplanton (Z) equation:

$$sms(Z) = \gamma_1 G(P)Z - \gamma_2 Z - \mu_Z Z^2 \quad (3)$$

Nitrogen detritus ( $D_N$ ) equation:

$$sms(D_N) = (1 - \gamma_1) G(P)Z + \mu_P P + \mu_Z Z^2 - \mu_{D_N} D_N - w_s \frac{\partial D_N}{\partial z} \quad (4)$$

Phosphorus detritus ( $D_P$ ) equation:

$$sms(D) = (1 - \gamma_1) G(P)Z + \mu_P P + \mu_Z Z^2 - \mu_{D_P} D_P - w_s \frac{\partial D_P}{\partial z} \quad (5)$$

Nitrate ( $NO_3$ ) equation:

$$sms(NO_3) = (\mu_D D + \gamma_2 Z) \left(1 - 0.8 R_{O:N} r_{sox}^{NO_3}\right) - \bar{J}P \quad (6)$$

Phosphate ( $PO_4$ ) equation:

$$sms(PO_4) = \mu_D D + \gamma_2 Z - \bar{J}P \quad (7)$$

#### 1.1 Phytoplankton growth

The function  $\bar{J} = \bar{J}(I, NO_3, PO_4)$  provides the growth rate of non-diazotrophic phytoplankton determined from irradiance ( $I$ ),  $NO_3$ ,  $PO_4$ ,

$$\bar{J}(I, NO_3, PO_4) = \min(J_I, J_{max} u_{NO_3}, J_{max} u_{PO_4}), \quad (8)$$

The maximum growth rate  $J_{max}$  is a function of temperature (T):

$$J_{max}(T) = a \cdot \exp\left(\frac{T}{T_b}\right) \quad (9)$$

such that growth rates increase by a factor of ten over the temperature range of -2 to 34 °C. We use  $a = 0.6 \text{ d}^{-1}$  for the maximum growth rate at 0 °C. Under nutrient-replete conditions, the light-limited growth rate  $J_I$  is calculated according to:

$$J_I = \frac{J_{max}\alpha I}{[J_{max}^2 + (\alpha I)^2]^{1/2}} \quad (10)$$

where  $\alpha$  is the initial slope of the photosynthesis vs. irradiance (P-I) curve.

Nutrient limitation is represented by the product of  $J_{max}$  and the nutrient uptake rates  $u_{\text{NO}_3} = \text{NO}_3 / (k_{\text{NO}_3} + \text{NO}_3)$  and  $u_{\text{PO}_4} = \text{PO}_4 / (k_{\text{PO}_4} + \text{PO}_4)$ , with  $k_{\text{PO}_4} = k_{\text{NO}_3} R_{\text{PO}_4:\text{NO}_3}$  providing the respective nutrient uptake rates.

## 1.2 Grazing

Zooplankton grazing of (non-nitrogen-fixing) phytoplankton  $G(P)$  is parameterized using a Holling type III function:

$$G(P) = \frac{g\epsilon P^2}{g + \epsilon P^2} \quad (11)$$

## 1.3 Sinking of Detritus

The rate of sinking of Detritus  $w_s$  is a linear function of depth  $z$  but can not exceed a maximum value of  $w_{\text{Dmax}}$ :

$$w_s = w_s(z) = \min(w_{\text{D0}} + m_w z, w_{\text{Dmax}}). \quad (12)$$

## 1.4 Ecosystem model parameters

| Parameter                                                      | Symbol             | Value | Units                                       |
|----------------------------------------------------------------|--------------------|-------|---------------------------------------------|
| <b>Phytoplankton (P) Coefficients</b>                          |                    |       |                                             |
| Initial slope of P-I curve                                     | $\alpha$           | 0.025 | $\text{day}^{-1}/(\text{W m}^{-2})$         |
| Maximum growth rate                                            | $a$                | 0.6   | $\text{day}^{-1}$                           |
| E-folding temperature of biotic rates                          | $T_b$              | 15.65 | $^{\circ}\text{C}$                          |
| Half-saturation constant for N uptake                          | $k_{\text{NO}_3}$  | 0.5   | $\text{mmol m}^{-3}$                        |
| Specific mortality rate of (non nitrogen-fixing) phytoplankton | $\mu_P$            | 0.03  | $\text{day}^{-1}$                           |
| <b>Zooplankton (Z) Coefficients</b>                            |                    |       |                                             |
| Assimilation efficiency                                        | $\gamma_1$         | 0.75  |                                             |
| Maximum grazing rate                                           | $g$                | 2.0   | $\text{day}^{-1}$                           |
| Prey capture rate                                              | $\epsilon$         | 1.0   | $(\text{mmol m}^{-3})^{-2} \text{day}^{-1}$ |
| (Quadratic) mortality                                          | $\mu_Z$            | 0.2   | $(\text{mmol m}^{-3})^{-2} \text{day}^{-1}$ |
| Excretion                                                      | $\gamma_2$         | 0.03  | $\text{day}^{-1}$                           |
| <b>Detrital (D) Coefficients</b>                               |                    |       |                                             |
| Detrital nitrogen remineralization rate                        | $\mu_{\text{DN}}$  | 0.05  | $\text{day}^{-1}$                           |
| Euphotic layer detrital phosphorus remineralization rate       | $\mu_{\text{DPS}}$ | 0.1   | $\text{day}^{-1}$                           |
| Detrital phosphorus remineralization rate                      | $\mu_{\text{DP}}$  | 0.05  | $\text{day}^{-1}$                           |
| Sinking speed at surface                                       | $w_{\text{D0}}$    | 7     | $\text{m day}^{-1}$                         |
| Increase of sinking speed with depth                           | $m_w$              | 0.04  | $\text{day}^{-1}$                           |
| Maximum sinking speed in water column                          | $w_{\text{Dmax}}$  | 40    | $\text{m day}^{-1}$                         |

## References

- [1] A. Oschlies and V. Garçon, 1999: An eddy-permitting coupled physical-biological model of the North Atlantic. Part I: Sensitivity to advection numerics and mixed layer physics. *Global Biogeochem. Cycles*, **13**.
- [2] A. Schmittner, A. Oschlies, X. Giraud, M. Eby, and H.L. Simmons, 2005: A global model of the marine ecosystem for long term simulations: sensitivity to ocean mixing, buoyancy forcing, particle sinking and dissolved organic matter cycling. *Global Biogeochem. Cycles*, **19**.
